# Supplementary material for: Optimization of laser capture microdissection and RNA amplification for gene expression profiling of prostate cancer
Source: Springer Nature journal article supplement (doi:10.1186/1471-2199-8-25), 2007-03-21
Supplement: Additional file 12 [file 1471-2199-8-25-s12.doc]

| PSA 3’ left | 5’-gagggagggtcttcctttgg-3’ |
| --- | --- |
| PSA 3’ right | 5’-ggttgtctggaggacttcaataca-3’ |
| PSA 5’ left | 5’-gaagacacaggccaggtatttca-3’ |
| PSA 5’ right | 5’-gtggctggagtcatcacctg-3’ |
| β-actin 3’ left | 5’-tcctctcccaagtccacaca-3’ |
| β-actin 3’ right | 5’-gcacgaaggctcatcattca-3’ |
| β-actin M left | 5’-gatcattgctcctcctgagc-3’ |
| β-actin M right | 5’-agtccgcctagaagcatttg-3’ |
| AMACR left | 5’-cagtaactcggggcctgttt-3’ |
| AMACR right | 5’-tggatgttgctgtgtgttgg-3’ |
| hepsin left | 5’-ggctgtgtggcattgtgagt-3’ |
| hepsin right | 5’-gctggcttcggagtgagtct-3’ |
